# Supplementary material
Source: PubMed Central journal article supplement (PMC2633081)
Supplement: emboj2008254s1.pdf [file emboj2008254s1.pdf]

## Supplemental Data

### Identification, structure, and functional requirement of the Mediator submodule

#### Med7N/31

Tobias Koschubs<sup>1</sup>, Martin Seizl<sup>1</sup>, Laurent Larivière<sup>1</sup>, Fabian Kurth<sup>1</sup>, Sonja Baumli<sup>2</sup>, Dietmar E. Martin<sup>1</sup>,  
& Patrick Cramer<sup>1‡</sup>

<sup>1</sup>Gene Center and Center for Integrated Protein Science Munich (CIPSM), Department of Chemistry and Biochemistry, Ludwig-Maximilians-Universität (LMU) München, Feodor-Lynen-Str. 25, 81377 Munich, Germany.

<sup>2</sup>Current address: Laboratory of Molecular Biophysics, Department of Biochemistry, University of Oxford, Oxford OX1 3QU, UK.

<sup>‡</sup>Address correspondence to:

Patrick Cramer, E-mail: [cramer@LMB.uni-muenchen.de](mailto:cramer@LMB.uni-muenchen.de), Fax: +49-89-2180-76999.

**Supplementary Table I** Data collection and refinement statistics for Med7N/31

|                                              | Selenomethionine<br>SAD<br>Med7 $\Delta$ C84/Med31 | Native dataset,<br>mutant construct 6<br>(Table S2) |
|----------------------------------------------|----------------------------------------------------|-----------------------------------------------------|
| <b>Data collection</b>                       |                                                    |                                                     |
| Space group                                  | R 32                                               | R 32                                                |
| Cell parameters                              |                                                    |                                                     |
| <i>a, b, c</i> (Å)                           | 174.6, 174.6, 117.8                                | 174.2, 174.2, 115.5                                 |
| $\alpha, \beta, \gamma$ (°)                  | 90, 90, 120                                        | 90, 90, 120                                         |
| Wavelength (Å)                               | 0.98                                               | 0.92                                                |
| Resolution range (Å) <sup>a</sup>            | 20-2.8 (2.97-2.80)                                 | 50-3.0 (3.18-3.00)                                  |
| Completeness (%)                             | 99.4 (98.0)                                        | 99.7 (98.2)                                         |
| Unique reflections                           | 32,854 (5275)                                      | 13576 (2138)                                        |
| Redundancy                                   | 11.3 (9.1)                                         | 11.2 (11.0)                                         |
| Rsym (%)                                     | 6.0 (61.8)                                         | 5.0 (57.4)                                          |
| $\langle I \rangle / \langle \sigma \rangle$ | 27.8 (4.1)                                         | 32.7 (5.2)                                          |
| <b>Refinement</b>                            |                                                    |                                                     |
| Number of residues                           | 282                                                | 278                                                 |
| Number of non-hydrogen atoms                 | 2436                                               | 2402                                                |
| rms bond deviation (Å)                       | 0.007                                              | 0.008                                               |
| rms angle deviation (°)                      | 1.041                                              | 1.076                                               |
| Ramachandran plot (%)<br>(favored/allowed)   | 95.0/100.0                                         | 95.0/100.0                                          |
| Rcryst (%)                                   | 19.5                                               | 17.8                                                |
| Rfree (%) <sup>b</sup>                       | 24.3                                               | 23.1                                                |

<sup>a</sup> Highest resolution shell is shown in parenthesis.

<sup>b</sup> 5% of the data were set aside for free R-factor calculation.

**Supplementary Table II** Summary of Med7N mutant constructs of the polyproline stretches 1 and 2.

| No. | Med7N construct <sup>a</sup>  | Mutation                             | Replaced sequence | Copurification with Med31 |
|-----|-------------------------------|--------------------------------------|-------------------|---------------------------|
| 1   | Med7 (1-83)                   | - (crystallized construct)           |                   | yes                       |
| 2   | Med7 (20-83)                  | N-terminus including pPS1 removed    |                   | no                        |
| 3   | Med7 (23-83)                  | N-terminus including pPS1 removed    |                   | no                        |
| 4   | Med7 (1-61)                   | C-terminus including pPS2 removed    |                   | no                        |
| 5   | Med7 (1-66)                   | C-terminus including pPS2 removed    |                   | no                        |
| 6   | Med7 (1-83) (12...18 YSPTSPS) | pPS1 replaced by CTD-repeat          | LYPPPPP           | yes                       |
| 7   | Med7 (1-83) (13...19 YSPTSPS) | pPS1 replaced by CTD-repeat          | YPPPPPY           | yes                       |
| 8   | Med7 (1-83) (66...72 YSPTSPS) | pPS2 replaced by CTD-repeat          | IPPPMPK           | no                        |
| 9   | Med7 (1-83) (65...71 YSPTSPS) | pPS2 replaced by CTD-repeat          | LIPPPMP           | no                        |
| 10  | Med7 (1-83) (12...18 SPSTPSY) | pPS1 replaced by reversed CTD-repeat | LYPPPPP           | yes                       |
| 11  | Med7 (1-83) (12...18 YSPTDPS) | pPS1 replaced by mutated CTD-repeat  | LYPPPPP           | yes                       |
| 12  | Med7 (1-83) (12...18 YSPTRPS) | pPS1 replaced by mutated CTD-repeat  | LYPPPPP           | yes                       |
| 13  | Med7 (1-83) (12...18 YDPTSPS) | pPS1 replaced by mutated CTD-repeat  | LYPPPPP           | yes                       |

<sup>a</sup> For interaction assays, Med7 (1-83), Med7 (1-61), Med7 (1-66), Med7 (20-83), Med7 (23-83) were cloned into pET21b using *NdeI/SalI*, such that a N-terminal Strep-tag was introduced. With these constructs, copurification was analyzed both via the His-tag on Med31 and via the Strep-tag on the Med7 variants.

**Supplementary Table III** List of yeast strains used within this study.

| Strain                       | Genotype                                                                                                                                                                      | Source                     |
|------------------------------|-------------------------------------------------------------------------------------------------------------------------------------------------------------------------------|----------------------------|
| wt                           | BY4741; <i>MATa</i> ; <i>his3Δ1</i> ; <i>leu2Δ0</i> ; <i>met15Δ0</i> ; <i>ura3Δ0</i>                                                                                          | Euroscarf<br>Y00000        |
| <i>MED7/med7Δ</i>            | BY4743; <i>MATa/α</i> ; <i>his3Δ1/his3Δ1</i> ; <i>leu2Δ0/leu2Δ0</i> ;<br><i>lys2Δ0/LYS2</i> ; <i>MET15/met15Δ0</i> ; <i>ura3Δ0/ura3Δ0</i> ;<br><i>YOL135C::kanMX4/YOL135C</i> | Euroscarf<br>Y26285        |
| <i>MED7</i> shuffle          | Y26285 sporulated; <i>MATa</i> or <i>MATα</i> ;<br><i>YOL135C::KanMX4/p20062</i> (cognate clone plasmid)                                                                      | this work                  |
| <i>med31Δ</i>                | BY4741; <i>YGL127C::kanMX4</i>                                                                                                                                                | Euroscarf<br>Y04494        |
| <i>med7NΔ</i>                | BY4741; <i>YOL135C::YOL135ΔN84-ClonNAT</i>                                                                                                                                    | this work                  |
| <i>med7N/31Δ</i>             | BY4741; <i>YOL135C::YOL135ΔN84-ClonNAT</i> ;<br><i>YGL127C::kanMX4</i>                                                                                                        | this work                  |
| wt/ <i>Med18-TAP</i>         | BY4741; <i>YGR104C::YGR104C-TAP-URA3</i>                                                                                                                                      | this work                  |
| <i>med31Δ/ Med18-TAP</i>     | BY4741; <i>YGL127C::kanMX4</i> ; <i>YGR104C::YGR104C-TAP-URA3</i>                                                                                                             | this work                  |
| <i>med7NΔ/ Med18-TAP</i>     | BY4741; <i>YOL135C::YOL135ΔN84-ClonNAT</i> ;<br><i>YGR104C::YGR104C-TAP-URA3</i>                                                                                              | this work                  |
| <i>med7N/31Δ / Med18-TAP</i> | BY4741; <i>YOL135C::YOL135ΔN84-ClonNAT</i> ;<br><i>YGL127C::kanMX4</i> ; <i>YGR104C::YGR104C-TAP-URA3</i>                                                                     | this work                  |
| <i>dst1Δ</i>                 | BY4741; <i>YGL0143W::kanMX4</i>                                                                                                                                               | Euroscarf<br>Y04411        |
| <i>med18Δ</i>                | Y24734 sporulated; <i>MATa</i> or <i>MATα</i> ; <i>YGR104C::kanMX4</i>                                                                                                        | (Larivière et<br>al, 2008) |
| <i>med8CΔ</i>                | Y23333 sporulated; <i>MATa</i> or <i>MATα</i> ; <i>YBR193C::kanMX4</i>                                                                                                        | (Larivière et<br>al, 2008) |
| <i>cycCΔ</i>                 | BY4741; <i>YNL025C::kanMX4</i>                                                                                                                                                | Euroscarf<br>Y05351        |
| <i>med1Δ</i>                 | BY4741; <i>YPR070W::kanMX4</i>                                                                                                                                                | Euroscarf<br>Y05489        |
| <i>med9Δ</i>                 | BY4741; <i>YNR010W::kanMX4</i>                                                                                                                                                | Euroscarf<br>Y05385        |
| <i>med2Δ</i>                 | BY4742; <i>YDL005C::kanMX4</i>                                                                                                                                                | Euroscarf<br>Y13701        |
| <i>med3Δ</i>                 | BY4741; <i>YGL025C::kanMX4</i>                                                                                                                                                | Euroscarf<br>Y04393        |
| <i>med5Δ</i>                 | BY4741; <i>YGL151W::kanMX4</i>                                                                                                                                                | Euroscarf<br>Y04518        |

**Supplementary Table IV** Analysis of transcriptome profiling. (A) List of up- and down-regulated genes in the yeast deletion strains *med31Δ*, *med7NΔ*, *med7N/31Δ* and *dst1Δ*. (B) Overrepresented biological processes and associated genes detected in the GO analysis of *med31Δ*, *med7NΔ*, *med7N/31Δ*

and *dst1Δ* profiles. **(C)** GO-analysis for the *med7N/31Δ*, *med8C/18/20Δ* and *med2/3Δ* submodule profiles. **(D)** GO-comparison table and visualization of the three submodule deletion profiles. The data was split into up- and down-regulated genes (red and green bars, respectively). **(E)** Complete list of expression values of the yeast deletion strains *med31Δ*, *med7NΔ*, *med7N/31Δ* and *dst1Δ*. **(F)** Ranking of transcription factors based on Fisher's exact test which are potentially regulating the differentially expressed genes in *med31Δ*, *med7NΔ*, *med7N/31Δ* and *dst1Δ* strains. **(G)** Ranking of transcription factors based on Fisher's exact test which are potentially regulating the differentially expressed genes in Med7N/31, Med8C/18/20 and Med2/3 submodule deletion strains.

**Supplementary Table V** Mass spectrometry analysis of Mediator TAP-tag purification of Figure 3E.

**Supplementary Figure 1** *In vitro* transcription assay using Gal4-Gal4activation-helix (Gal4-Gal4AH) as activator (Carey et al, 1990). A *med7N/31Δ* nuclear extract was also defective in activated transcription using a Gal4-Gal4AH as activator (lane 1) but could be rescued by addition of recombinant Med7N/31 (lane 2, 200 pmol). Similarly as shown in Figure 3D, the reconstituted complex could be further stimulated by addition of recombinant TFIIS (lane 3-5, 20-60 pmol). The assay was performed using 100 μg of nuclear extract.

**Supplementary Figure 2** Analysis of published genetic interactions of Med31 and TFIIS. **(A)** Common and disparate synthetic lethality partners of Med31 and TFIIS are depicted as nodes. **(B)** Common and disparate phenotypic suppression partners of Med31 and TFIIS. Figures were prepared using the Osprey software (Breitkreutz et al, 2003) with interaction data (compare interaction references) downloaded from BioGrid database (Stark et al, 2006).

## References

- Alexa A, Rahnenfuhrer J, Lengauer T (2006) Improved scoring of functional groups from gene expression data by decorrelating GO graph structure. *Bioinformatics* **22**: 1600-1607
- Breitkreutz BJ, Stark C, Tyers M (2003) Osprey: a network visualization system. *Genome Biol* **4**: R22
- Carey M, Leatherwood J, Ptashne M (1990) A potent GAL4 derivative activates transcription at a distance in vitro. *Science (New York, NY)* **247**: 710-712
- Larivière L, Seizl M, van Wageningen S, Röther S, van de Pasch L, Feldmann H, Sträßer K, Hahn S, Holstege FCP, Cramer P (2008) Structure-system correlation identifies a gene regulatory Mediator submodule. *Genes Dev* **22**: 872--877
- Stark C, Breitkreutz BJ, Reguly T, Boucher L, Breitkreutz A, Tyers M (2006) BioGRID: a general repository for interaction datasets. *Nucleic acids research* **34**: D535-539

## Interaction data references

- Archambault J, Jansma DB, Kawasoe JH, Arndt KT, Greenblatt J, Friesen JD (1998) Stimulation of transcription by mutations affecting conserved regions of RNA polymerase II. *Journal of bacteriology* **180**: 2590-2598
- Collins SR, Miller KM, Maas NL, Roguev A, Fillingham J, Chu CS, Schuldiner M, Gebbia M, Recht J, Shales M, Ding H, Xu H, Han J, Ingvarsdottir K, Cheng B, Andrews B, Boone C, Berger SL, Hieter P, Zhang Z, Brown GW, Ingles CJ, Emili A, Allis CD, Toczyski DP, Weissman JS, Greenblatt JF, Krogan NJ (2007) Functional dissection of protein complexes involved in yeast chromosome biology using a genetic interaction map. *Nature* **446**: 806-810
- Costa PJ, Arndt KM (2000) Synthetic lethal interactions suggest a role for the *Saccharomyces cerevisiae* Rtf1 protein in transcription elongation. *Genetics* **156**: 535-547
- Davie JK, Kane CM (2000) Genetic interactions between TFIIS and the Swi-Snf chromatin-remodeling complex. *Mol Cell Biol* **20**: 5960-5973
- Denis CL, Chiang YC, Cui Y, Chen J (2001) Genetic evidence supports a role for the yeast CCR4-NOT complex in transcriptional elongation. *Genetics* **158**: 627-634
- Fan HY, Cheng KK, Klein HL (1996) Mutations in the RNA polymerase II transcription machinery suppress the hyperrecombination mutant hpr1 delta of *Saccharomyces cerevisiae*. *Genetics* **142**: 749-759
- Fish RN, Ammerman ML, Davie JK, Lu BF, Pham C, Howe L, Ponticelli AS, Kane CM (2006) Genetic interactions between TFIIF and TFIIS. *Genetics* **173**: 1871-1884
- Guglielmi B, Soutourina J, Esnault C, Werner M (2007) TFIIS elongation factor and Mediator act in conjunction during transcription initiation in vivo. *Proc Natl Acad Sci U S A* **104**: 16062-16067
- Hartzog GA, Wada T, Handa H, Winston F (1998) Evidence that Spt4, Spt5, and Spt6 control transcription elongation by RNA polymerase II in *Saccharomyces cerevisiae*. *Genes Dev* **12**: 357-369
- Jona G, Wittschieben BO, Svejstrup JQ, Gileadi O (2001) Involvement of yeast carboxy-terminal domain kinase I (CTDK-I) in transcription elongation in vivo. *Gene* **267**: 31-36
- Krogan NJ, Keogh MC, Datta N, Sawa C, Ryan OW, Ding H, Haw RA, Pootoolal J, Tong A, Canadien V, Richards DP, Wu X, Emili A, Hughes TR, Buratowski S, Greenblatt JF (2003) A Snf2 family ATPase complex required for recruitment of the histone H2A variant Htz1. *Mol Cell* **12**: 1565-1576
- Larabee RN, Krogan NJ, Xiao T, Shibata Y, Hughes TR, Greenblatt JF, Strahl BD (2005) BUR kinase selectively regulates H3 K4 trimethylation and H2B ubiquitylation through recruitment of the PAF elongation complex. *Curr Biol* **15**: 1487-1493
- Malagon F, Tong AH, Shafer BK, Strathern JN (2004) Genetic interactions of DST1 in *Saccharomyces cerevisiae* suggest a role of TFIIS in the initiation-elongation transition. *Genetics* **166**: 1215-1227

- Merker RJ, Klein HL (2002) hpr1Delta affects ribosomal DNA recombination and cell life span in *Saccharomyces cerevisiae*. *Mol Cell Biol* **22**: 421-429
- Pan X, Ye P, Yuan DS, Wang X, Bader JS, Boeke JD (2006) A DNA integrity network in the yeast *Saccharomyces cerevisiae*. *Cell* **124**: 1069-1081
- Prather D, Krogan NJ, Emili A, Greenblatt JF, Winston F (2005) Identification and characterization of Elf1, a conserved transcription elongation factor in *Saccharomyces cerevisiae*. *Mol Cell Biol* **25**: 10122-10135
- Shaw RJ, Wilson JL, Smith KT, Reines D (2001) Regulation of an IMP dehydrogenase gene and its overexpression in drug-sensitive transcription elongation mutants of yeast. *J Biol Chem* **276**: 32905-32916
- Squazzo SL, Costa PJ, Lindstrom DL, Kumer KE, Simic R, Jennings JL, Link AJ, Arndt KM, Hartzog GA (2002) The Paf1 complex physically and functionally associates with transcription elongation factors in vivo. *Embo J* **21**: 1764-1774
- Suter B, Tong A, Chang M, Yu L, Brown GW, Boone C, Rine J (2004) The origin recognition complex links replication, sister chromatid cohesion and transcriptional silencing in *Saccharomyces cerevisiae*. *Genetics* **167**: 579-591
- Tong AH, Lesage G, Bader GD, Ding H, Xu H, Xin X, Young J, Berriz GF, Brost RL, Chang M, Chen Y, Cheng X, Chua G, Friesen H, Goldberg DS, Haynes J, Humphries C, He G, Hussein S, Ke L, Krogan N, Li Z, Levinson JN, Lu H, Menard P, Munyana C, Parsons AB, Ryan O, Tonikian R, Roberts T, Sdicu AM, Shapiro J, Sheikh B, Suter B, Wong SL, Zhang LV, Zhu H, Burd CG, Munro S, Sander C, Rine J, Greenblatt J, Peter M, Bretscher A, Bell G, Roth FP, Brown GW, Andrews B, Bussey H, Boone C (2004) Global mapping of the yeast genetic interaction network. *Science* **303**: 808-813
- Wery M, Shematorova E, Van Driessche B, Vandenhaute J, Thuriaux P, Van Mullem V (2004) Members of the SAGA and Mediator complexes are partners of the transcription elongation factor TFIIS. *Embo J* **23**: 4232-4242
- Xiao T, Kao CF, Krogan NJ, Sun ZW, Greenblatt JF, Osley MA, Strahl BD (2005) Histone H2B ubiquitylation is associated with elongating RNA polymerase II. *Mol Cell Biol* **25**: 637-651
- Zhao R, Davey M, Hsu YC, Kaplanek P, Tong A, Parsons AB, Krogan N, Cagney G, Mai D, Greenblatt J, Boone C, Emili A, Houry WA (2005) Navigating the chaperone network: an integrative map of physical and genetic interactions mediated by the hsp90 chaperone. *Cell* **120**: 715-727
