# Supplementary material
Source: PubMed Central journal article supplement (PMC2633081)
Supplement: emboj2008254s3.pdf [file emboj2008254s3.pdf]

A

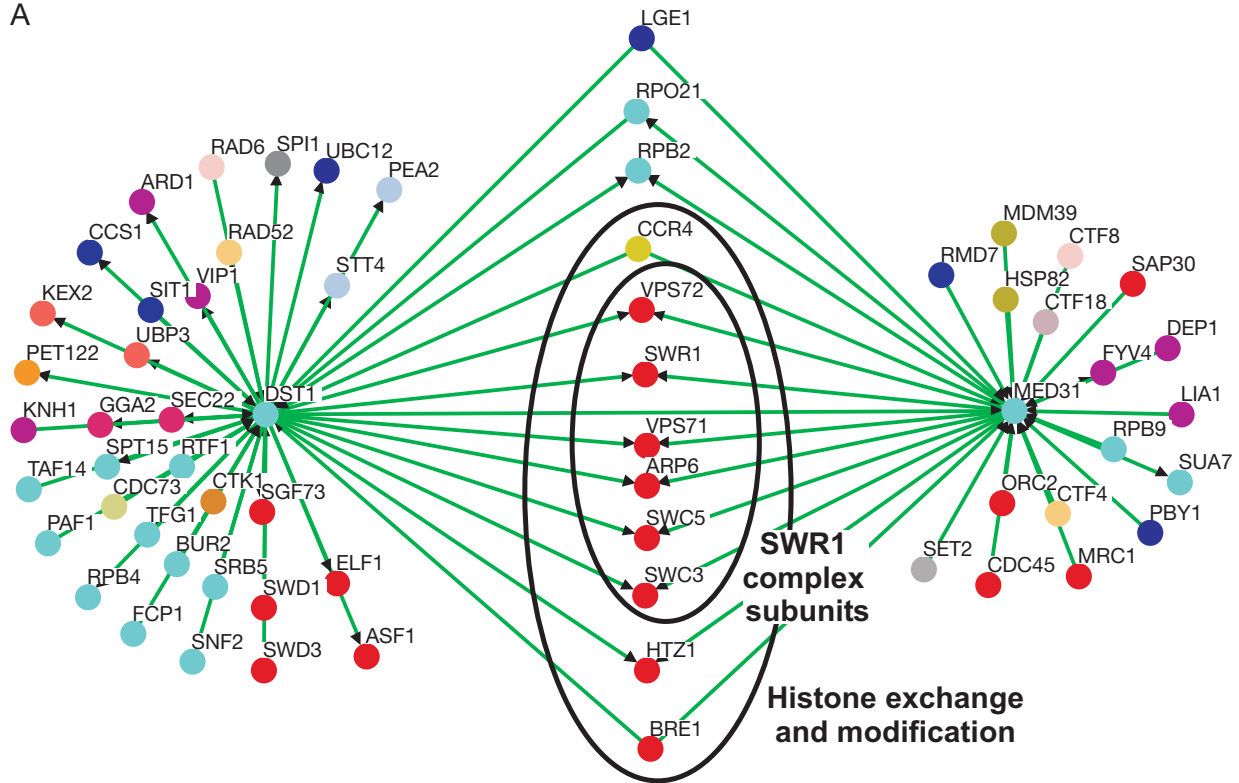

B

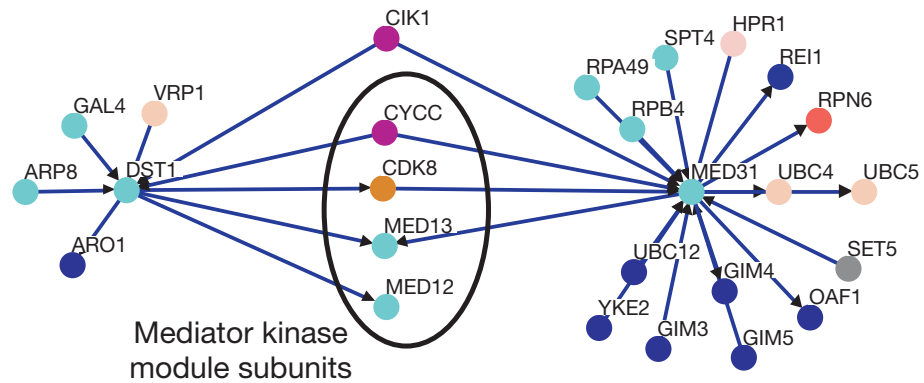

Experimental Systems

- SYNTHETIC LETHALITY
- PHENOTYPIC SUPPRESSION

- Transcription
- Metabolism
- DNA metabolism
- Cell organization and biogenesis
- Protein transport
- Cell cycle
- DNA replication
- Transport

Vertices

- DNA repair
- DNA damage response
- DNA recombination
- Protein degradation
- Sporulation
- RNA processing
- Protein amino acid dephosphorylation
- Carbohydrate metabolism
- Signal transduction
- Stress response
- Protein biosynthesis
- UNKNOWN
- Protein amino acid phosphorylation
