# Supplementary material
Source: PubMed Central journal article supplement (PMC2633081)

*med7N/31Δ*

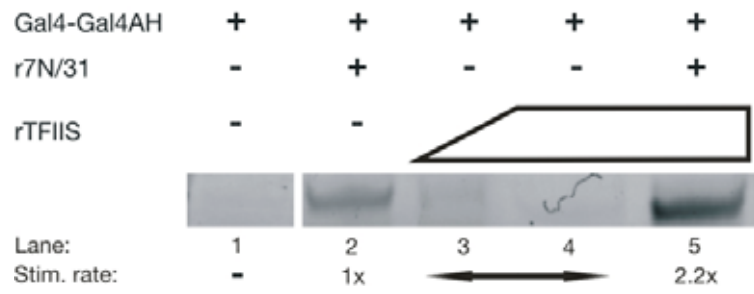

Supplement: emboj2008254s2.pdf [file emboj2008254s2.pdf]
